# Supplementary material for: Medical-Grade Honey as an Alternative Treatment for Antibiotics in Non-Healing Wounds—A Prospective Case Series
Source: MDPI journal article supplement (doi:10.3390/antibiotics10080918), 2021-07-28
Supplement: s1 [file s1]

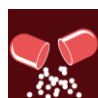

Supplementary Table S1. Overview of the presented cases.

| Case No. | Gender/age (years) | Patient characteristics                                                                                                    | Wound type and location                        | Previous treatments                                                                      | Signs of infection                                                      | Bacterial determination                                           | Pain VAS (score 1-10)         | Antibiotic treatment |
|----------|--------------------|----------------------------------------------------------------------------------------------------------------------------|------------------------------------------------|------------------------------------------------------------------------------------------|-------------------------------------------------------------------------|-------------------------------------------------------------------|-------------------------------|----------------------|
| 1        | Female (57)        | Ovarian and breast cancer, DM                                                                                              | Dehiscence of the surgical scar at left breast | Bioceramic sterile dressing applied for three months                                     | Local: Delayed healing, pain                                            | not performed                                                     | Daytime - 5<br>Procedural - 8 | No                   |
| 2        | Male (43)          | <b>CHVI, DM, obesity (BMI 30), repeated venous lower ulcers</b>                                                            | Venous leg ulcer at right lower leg            | Iodinated povidone solution                                                              | Local: pain, erythema, local warmth, exudate, delayed healing, malodour | Enterococcus faecalis, Escherichia coli                           | Daytime - 8<br>Procedural - 9 | No                   |
| 3        | Male (72)          | <b>CHVI, DM, HT, condition after thrombosis of the right lower leg</b>                                                     | Venous leg ulcer at right lower leg            | Iodinated povidone solution<br>Antibiotic treatment – Ampicillin (tablets)               | Local: pain, delayed healing, malodour                                  | Enterococcus faecalis, Escherichia coli                           | Daytime - 6<br>Procedural - 9 | No                   |
| 4        | Female (75)        | <b>CHVI, DM, HT, condition after varices surgery on the left lower leg</b>                                                 | Venous leg ulcer at left lower leg             | antiseptic dressing with silver nanoparticles                                            | Local: pain, delayed healing                                            | Staphylococcus aureus                                             | Daytime - 5<br>Procedural - 7 | No                   |
| 5        | Male (59)          | Repeated diabetic gangrene, repeated amputation of fingers on the right foot, diabetic neuropathy DM, HT, obesity (BMI 32) | <b>Diabetic foot ulcer at right foot</b>       | Iodinated povidone solution<br>Antibiotic treatment – Gentamicin gel (local application) | Local: pain, exudate, delayed healing, malodour                         | Proteus mirabilis, Staphylococcus aureus, Acinetobacter baumannii | Daytime - 1<br>Procedural - 1 | No                   |
| 6        | Male (54)          | CHVI, HT, DM, hyperlipidemia, hyperuricemia                                                                                | Venous leg ulcer at right lower leg            | Iodinated povidone solution                                                              | Local: pain, delayed healing                                            | Enterococcus faecalis                                             | Daytime - 6<br>Procedural - 8 | No                   |
| 7        | Male (52)          | CHVI, DM, HT hyperlipidemia, hyperuricemia, morbid obesity (BMI 45), <b>repeated venous lower ulcers</b>                   | Bilateral venous leg ulcer                     | Iodinated povidone solution                                                              | Local: pain, delayed healing                                            | Proteus mirabilis, Staphylococcus aureus                          | Daytime - 5<br>Procedural - 8 | No                   |
| 8        | Female (51)        | <b>DM, HT morbid obesity (BMI 45), repeated wounds on the right foot of diabetic foot syndrome</b>                         | <b>Diabetic foot ulcer at left foot</b>        | Iodinated povidone solution                                                              | Local: pain, delayed healing                                            | Proteus mirabilis, Staphylococcus aureus, Enterococcus faecalis   | Daytime - 5<br>Procedural - 8 | No                   |
| 9        | Male (49)          | <b>DM, HT, hyperlipidemia,</b>                                                                                             | Venous leg ulcer at right lower leg            | antiseptic dressing with silver nanoparticles                                            | Local: pain, delayed healing, malodour                                  | Enterococcus faecalis                                             | Daytime - 5<br>Procedural - 8 | No                   |

---

condition after  
thrombosis of the  
right lower leg

---

*CHVI - Chronic venous insufficiency; DM – diabetes mellitus type 2; HT – hypertension; VAS – visual analogue scale*
